# Supplementary material for: Single crystal cis–trans photoisomerizations of 2-(9-anthrylmethylene)-1-indanones
Source: Royal Society of Chemistry journal article supplement (doi:10.1039/b821900a), 2009-01-01
Supplement: b821900a.pdf [file b821900a.pdf]

## Refinement of the disordered structures

### (*Z*)-2-(9-anthrylmethylene)-1-indanone (*cis*-1)

The molecular structures of the irradiated *cis*-1 crystal, which contains *cis*- and *trans*-1, were refined as follows. Only 5 carbonyl oxygen and methylene hydrogen atoms of the two forms were refined at separate positions in the disorder model. H atoms were refined according to the riding model. All the C and O atoms were refined anisotropically.

Populations of the *cis*- and *trans*-forms were determined 10 from the same refinement as above except that the disordered O atoms were refined isotropically using a common temperature factor. These O atoms were then refined anisotropically using a common temperature factor with the fixed populations.

### 15 (*E*)-2-(9-anthrylmethylene)-6-methyl-1-indanone (*trans*-2)

The molecular structures of the irradiated *trans*-2 crystal, which contains *trans*- and *cis*-2, were refined as follows. All the C and O atoms of the product (*cis*-1) were refined as a rigid body, where the structures of the anthracene ring and the 20 2-methylene-1-indanone moiety were taken from those of *trans*-2 before irradiation. H atoms were refined according to the riding model. All the C and O atoms were refined anisotropically. Each pair of the corresponding non-H atoms of *trans*- and *cis*-2 were refined using a common temperature 25 factor.

Populations of the *trans*- and *cis*-forms were determined from the same refinement as above except that all atoms were refined isotropically using a common temperature factor for all the C atoms and another temperature factor for the O atoms. 30 The populations were held constant during the subsequent anisotropic refinement.

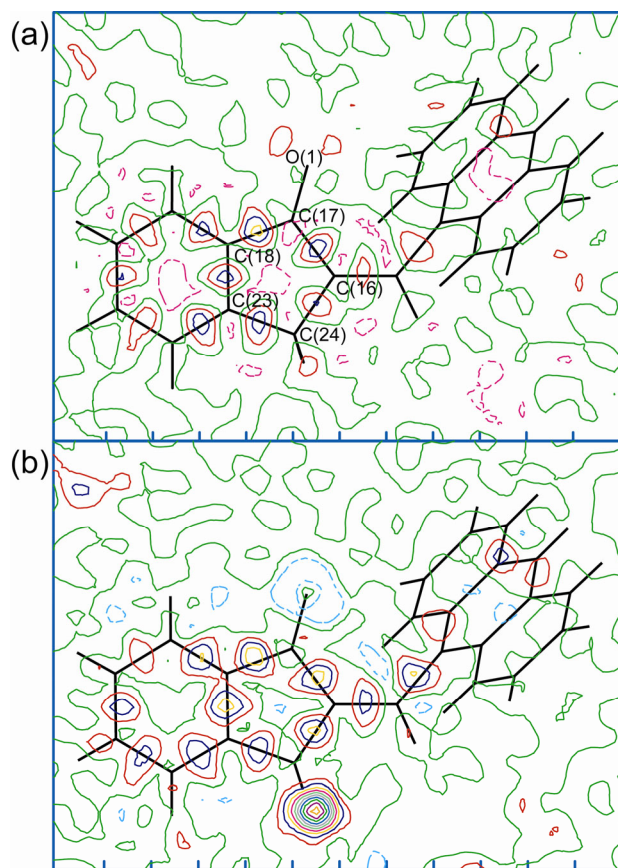

Fig. S1 Difference electron density maps of (*Z*)-2-(9-anthrylmethylene)-1-indanone (*cis*-1). The section of each map is the least-squares mean plane of five carbon atoms (C(16), C(17), C(18), C(23) and C(24)). The contour lines are at 0.1 eÅ<sup>-3</sup> intervals. Negative contours are indicated by broken lines. (a) Before irradiation; (b) after 20 hr irradiation.

Table S1 Crystal data and structure refinements for compounds *cis*-1 and *trans*-2

| Compound                                                        | <i>cis</i> -1                     |             |             |             |             | <i>trans</i> -2                   |
|-----------------------------------------------------------------|-----------------------------------|-------------|-------------|-------------|-------------|-----------------------------------|
| Chemical formula                                                | C <sub>24</sub> H <sub>16</sub> O |             |             |             |             | C <sub>25</sub> H <sub>18</sub> O |
| Formula weight                                                  | 320.37                            |             |             |             |             | 334.39                            |
| Crystal system                                                  | Monoclinic                        |             |             |             |             | Monoclinic                        |
| Space group                                                     | P2 <sub>1</sub> /a                |             |             |             |             | C2/c                              |
| Irradiation time/hr                                             | 30                                | 40          | 50          | 70          | 0           | 16                                |
| Temperature                                                     | Room temperature                  |             |             |             |             | Room temperature                  |
| <i>a</i> /Å                                                     | 11.6272(8)                        | 11.6561(8)  | 11.7174(10) | 11.8493(9)  | 18.769(2)   | 18.7933(11)                       |
| <i>b</i> /Å                                                     | 13.9254(10)                       | 13.9147(10) | 13.8685(12) | 13.8243(11) | 10.7865(12) | 10.8304(7)                        |
| <i>c</i> /Å                                                     | 10.4577(8)                        | 10.5076(8)  | 10.5133(9)  | 10.4921(8)  | 18.524(2)   | 18.5389(11)                       |
| $\beta$ /°                                                      | 102.408(1)                        | 102.099(1)  | 101.625(2)  | 101.018(2)  | 108.689(2)  | 108.858(1)                        |
| <i>V</i> /Å <sup>3</sup>                                        | 1653.7(2)                         | 1666.4(2)   | 1673.4(2)   | 1687.0(2)   | 3552.4(7)   | 3570.8(4)                         |
| <i>Z</i>                                                        | 4                                 |             |             |             |             | 8                                 |
| Reflections collected                                           | 25652                             | 25641       | 25403       | 25739       | 26763       | 26883                             |
| Independent reflections                                         | 4837                              | 4875        | 4909        | 4953        | 5215        | 5238                              |
| <i>R</i> <sub>int</sub>                                         | 0.0301                            | 0.0330      | 0.0448      | 0.0605      | 0.0316      | 0.0296                            |
| Data/restraints/parameters                                      | 4837/0/229                        | 4875/0/229  | 4909/0/229  | 4953/0/229  | 5215/0/296  | 5238/0/243                        |
| Goodness-of-fit on <i>F</i> <sup>2</sup>                        | 1.033                             | 1.032       | 1.027       | 1.026       | 1.042       | 1.031                             |
| <i>R</i> [ <i>F</i> <sup>2</sup> > 2σ( <i>F</i> <sup>2</sup> )] | 0.0530                            | 0.0602      | 0.0667      | 0.0664      | 0.0494      | 0.0545                            |
| <i>wR</i> ( <i>F</i> <sup>2</sup> ) (all data)                  | 0.1601                            | 0.1840      | 0.1897      | 0.1821      | 0.1426      | 0.1548                            |
| $\rho$ <sub>min</sub> (e Å <sup>-3</sup> )                      | 0.259                             | 0.300       | 0.267       | 0.239       | 0.278       | 0.261                             |
| $\rho$ <sub>max</sub> (e Å <sup>-3</sup> )                      | -0.163                            | -0.223      | -0.217      | -0.161      | -0.224      | -0.331                            |
